# Supplementary material
Source: Springer Nature journal article supplement (https://www.springermedizin.de/resource/supplementary/13002_2011_249_MOESM5_ESM.pdf/9627496)

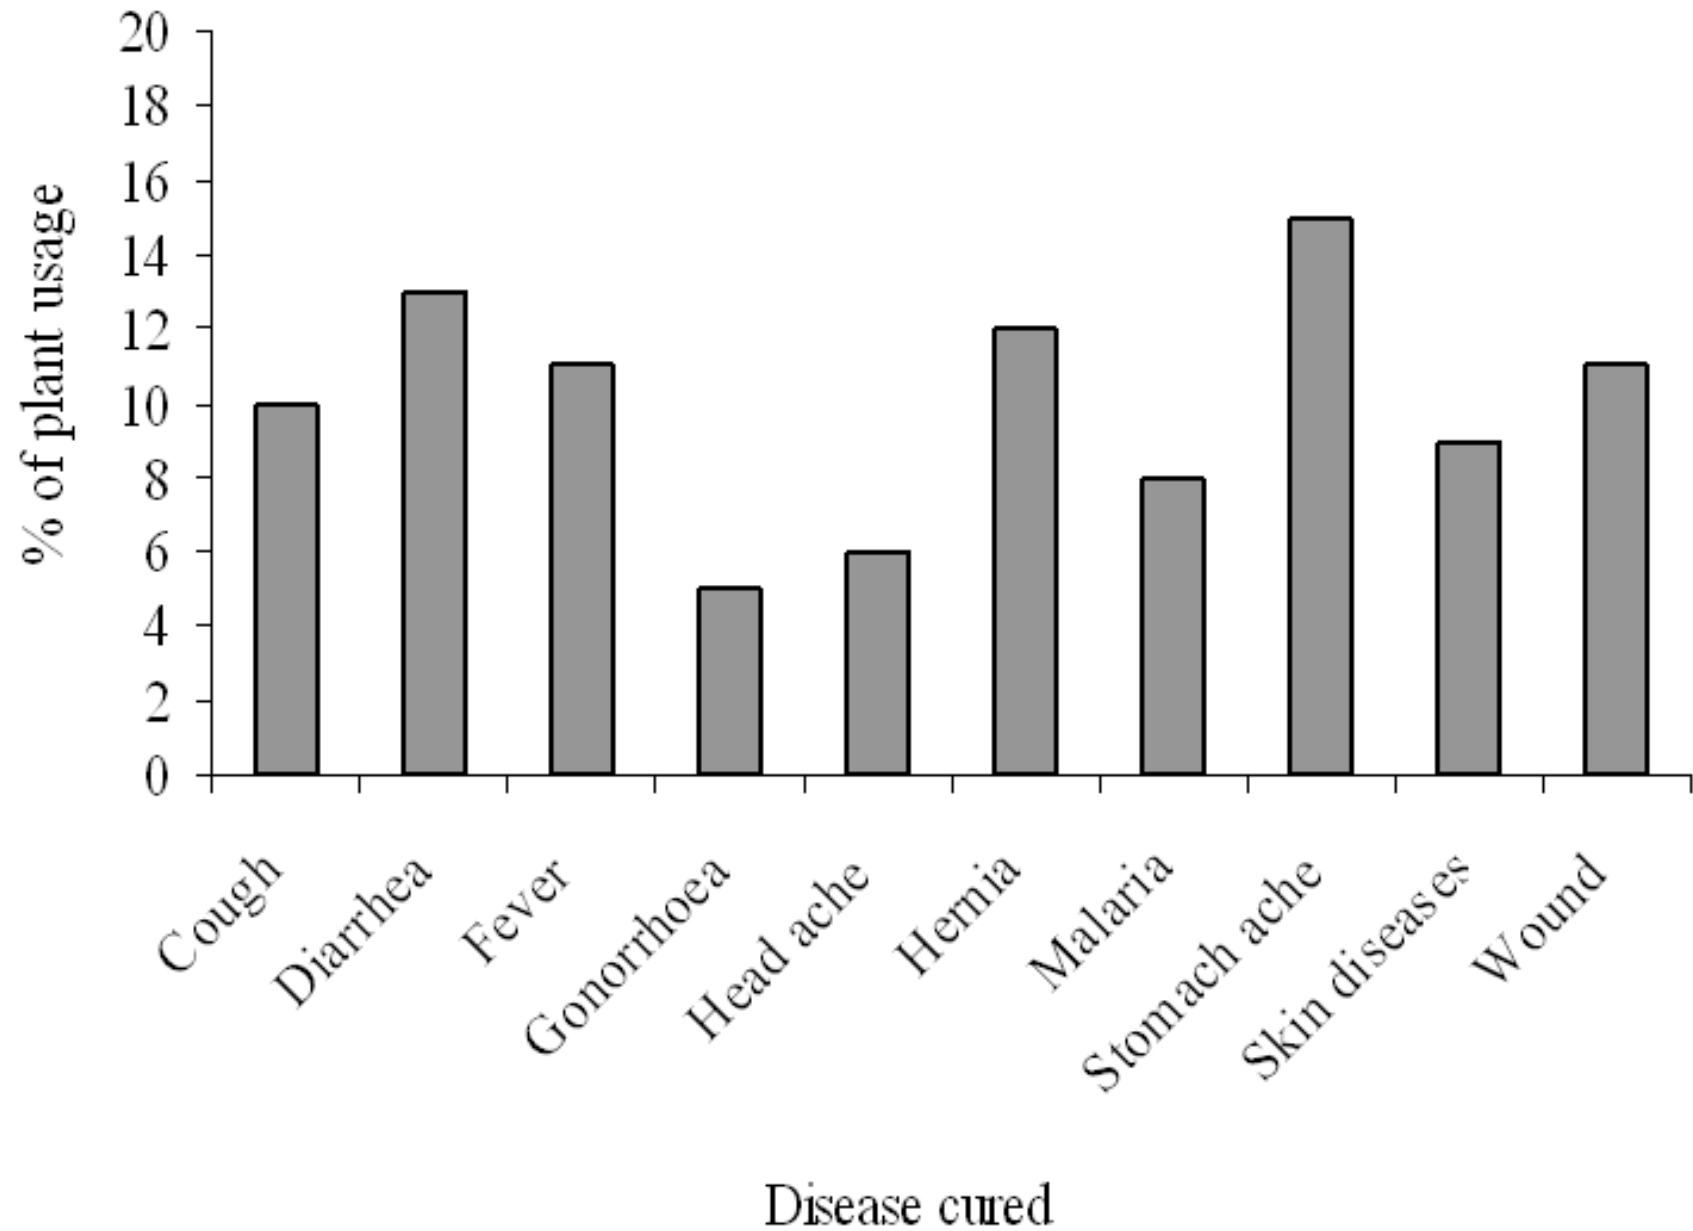

Supplement: MOESM5 [file 9627496]
